# Supplementary material
Source: Research Square preprint supplement (doi:10.21203/rs.3.rs-9532775/v1)
Supplement: Supplementary file 1 [file 43e7c4d8e7db5cca69a68631.docx]

Supplementary information.

COM-B Diagnosis: domains, Behaviour Change Techniques (BCTs), Theoretical Domain frameworks (TDFs) and DST mechanisms of action (MoA) in relation to AMR/antibiotic use. *Abbreviations: AB/X = antibiotics; Rx= prescription (adapted from presentation slide, Lorencatto F, Applying behavioural science to combating antimicrobial resistance* 43 *and drawing on the Storytelling Framework, Brooks et al*44*)*

| COM-B domain | Description of barrier/enabler | Example of AMR/antibiotic-related barriers/enablers (precursors) that influence desired behaviour (reduced unnecessary AB use) via DST | BCTs and associated DST mechanisms of action (MoA) |
| --- | --- | --- | --- |
| CAPABILITY - Individual’s psychological and physical capacity to engage in the activity concerned – include having necessary knowledge and skills | | | |
| Psychological capability | Knowledge, understanding, cognitive skills, mental resources about how AB work and how to reduce use of ABs, e.g. which symptoms need ABs. Knowledge & understanding of AMR – in both basic biomedical terms and real-life context. Confidence and self-efficacy in knowing when to act to reduce use of ABX.  **Influenced by:** education, training, and decision-making support. | **Knowledge about how antibiotics work and when they are needed inc. correcting misinformation** on treating non-serious, self-limiting infections e.g.symptomatic relief (beliefs on medication need/harms); **bacterial vs. viral**;  Gain of **knowledge and awareness vicariously via story characters**, empathy, **metaphors (comprehension), real-life scenarios, settings, language, fears, imagery, music..**  - effectively lowers the cognitive load & bridges psychological distance; persuading through knowledge  **Understanding of AMR threat now and future** to **individual and collective** (not just vulnerable) antibiotic use.; link AMR to **real life relatable scenarios via story**; **positive take-aways** e.g. using antibiotics only when necessary to help ensure continued efficacy for you; **Embed messages within broader narratives** related to the microbial world for greater appeal/resonance with the general, healthy public **e.g. microbiome; Reduce psychological distance** -cognitively -social, spatial or temporal similarity.  **Cognitive skills and decision-making around symptoms needing antibiotics inc. removing barriers** e.g. **reasons why people feel they cannot recover without antibiotics** via education.  **Short and snappy informational messaging –** maintain awareness of correct information  **Confidence and self-efficacy in reducing AB use inc.** how to **build resilience without antibiotics**; completing an AB course; **when to consult a medic** or self-care (self-efficacy); p**revention & vaccinations** (all self-efficacy | **BCTs**'5.1 Information about health consequences', '4.1 Instruction on how to perform the behaviour', '13.2 Framing/reframing', '9.1 Credible source' **TDFs:** Knowledge; Beliefs about Consequences  **MoAs:** Knowledge; Beliefs about Consequences; Entertainment -education  **BCTs:** 5.1 Information about health consequences', 5.3 Information about social and environmental consequences', '13.2 Framing/reframing' , '4.1 Instruction on how to perform the behaviour', '**TDFs:** Knowledge; Memory, Attention and Decision Processes  **MoAs:** Knowledge; Memory, Attention and Decision Processes  **BCTs:** '4.1 Instruction on how to perform the behaviour', '8.1 Behavioural practice/rehearsal', '1.2 Problem solving', '7.1 Prompts/cues' **TDFs:** Skills; Behavioural Regulation  MoAs: Skills; Behavioural Regulation  **BCTs:** '15.1 Verbal persuasion about capability', '8.1 Behavioural practice/rehearsal' **TDFs:** Beliefs about Capabilities  MoAs: Beliefs about Capabilities |
| Physical capability | Individual measures and actions to prevent infection, or to recover with/out ABs. Individual’s ability to rest or remain productive despite illness (without AB use)  **Influenced by:** availability & access to necessary resources | **Individual state of health or underlying disease which may predispose to antibiotic use;**  **Ensuring individual vaccinations up-to-date;**  **Practice hygiene**  **Access to cost-effective symptomatic relief:**  **Physical capability to recover at home** **without ABs** e.g. sickness cover or family help, WFH, childcare | **BCTs:** '3.1 Social support (unspecified)', '3.2 Social support (practical)', '12.5 Adding objects to the environment' **TDFs:** Skills; Environmental Context and Resources  **MoA:** Skills; Environmental Context and Resources  **BCTs:** '4.1 Instruction on how to perform the behaviour', '5.1 Information about health consequences', '7.1 Prompts/cues' **TDFs:** Skills; Knowledge; Beliefs about Consequences  **MoA:** Skills; Knowledge; Beliefs about Consequences  **BCTs:** '4.1 Instruction on how to perform the behaviour', '8.1 Behavioural practice/rehearsal', '2.3 Self-monitoring of behaviour', '7.1 Prompts/cues' **TDFs:** Skills; Behavioural Regulation  **MoA:** Skills; Behavioural Regulation  **BCTs:** '12.1 Restructuring the physical environment', '12.5 Adding objects to the environment', '3.2 Social support (practical)'] **TDFs:** Environmental Context and Resources  **MoA:** Environmental Context and Resources  **BCTs:** '3.1 Social support (unspecified)', '3.2 Social support (practical)', '12.1 Restructuring the physical environment' **TDFs:** Environmental Context and Resources; Social Influences  MoA: Environmental Context and Resources; Social Influences |
| OPPORTUNITY - External to individual; physical and social influences including resource availability, environmental cues, and social norms. | | | |
| Social opportunity | Social norms, cultural beliefs/practices, interpersonal influences. Formal rules and expectations.  Availability of social support; social networks; influence that predispose to participation/or not in a certain behaviour. **Influenced by:** altering the social environment to support or encourage the desired behaviour e.g. showing visible social proof by stories or other arts-based methods; credible influencers/messengers; highlight positive social norms | **Developing social norms and discourse to shape AMR perceptions (including psychological distance)**  **Use of real-life scenarios and stories (including across One Health) to shift social norms inc. nurture social acceptability of slower recovery** (workplace & wider society) **without antibiotics** Everyday relatable role models.  **Removing social barriers and promoting acceptability of slower recovery without antibiotics**  **Promoting everyday relatable role models (e.g. for self-care, responsible antibiotic use)**  **Social norms around vaccination, self-care, and infection prevention e.g. flu jab, prevent infection**  **Influence of family, friends, and healthcare professionals on AB-seeking behaviour e.g. POC sensitive, constructive POC interactions** | **BCTs:** 6.2 **Social comparison**, 6.3 Information about others’ approval, 5.3 **Information about social and environmental consequences**, 13.2 **Framing/reframing** **TDFs:** Social Influences; Social/Professional Role and Identity; Beliefs about Consequences  **MoA:** Social Influences; Norms; Beliefs about Consequences  **BCTs:** '6.1 Demonstration of the behaviour', '13.1 **Identification of self as role model'**, '6.2 **Social comparison',** '9.1 Credible source'  **TDFs**: Social Influences; Social/Professional Role and Identity  MoA: Social Influences; Social Learning/Imitation  **BCTs:** **'5.1 Information about health consequences'**, '6.3 Information about others’ approval', '13.2 Framing/reframing', '15.3 Focus on past success' **TDFs:** Social Influences; **Beliefs about Consequences**; **Social/Professional Role and Identity**  MoA: Social Influences; Beliefs about Consequences; Norms  **BCTs:** '13.1 Identification of self as role model', '6.1 Demonstration of the behaviour', '6.2 **Social comparison'**]**TDFs:** **Social Influences**; **Social/Professional Role and** **Identity**  **MoA:** Social Learning/Imitation; Social/Professional Role and Identity  **BCTs:** '5.1 **Information about health consequences',** '5.3 Information about social and environmental consequences', '6.3 **Information about others’ approval'** **TDFs:** **Social Influences; Beliefs about Consequences**  **MoA:** Social Influences; Beliefs about Consequences  **BCTs:** '3.1 **Social support (**unspecified)', '3.3 Social support (emotional)', '9.1 Credible source', '6.3 Information about others’ approval' **TDFs:** Social Influences; Environmental Context and Resources  MoA: Social Influences; Environmental Context and Resources |
| Physical opportunity | Resources, infrastructure, policies.Access to resources – pharmaceutical (symptomatic relief), physical/practical help to recovery, financial security.  **Influenced by:** communications campaigns e.g. consistent/joined up clear messages and cues on adverts and other material across channels; physical recovery help, good GP/HCP/pharmacist advice | **Easy, cost-effective, appointment-free access to non-GP HCP advice and medicines (e.g. Pharmacy First, OTC) infection prevention & prescribing policies and communication.**  **Exposure to adverts in surgery waiting rooms, pharmacies etc.. shift from a Rxing scenario to an ‘educational’ scenario e.g.info on GP appointment booking sites.**  **Time to discuss AB use/AMR at POC inc. Availability of delayed Rx**  **Prompts and cues in environments frequented by target individuals (e.g., AB over-users)**  **Other:** Physical help to recover at home without ABs e.g. sickness cover or family help, WFH, childcare, and infection prevention policies and communication in prescribing | **BCTs:** ['12.1 Restructuring the physical environment', '12.5 Adding objects to the environment', '3.2 Social support (practical)']. **TDFs:** Environmental Context and Resources  **MoA:** Environmental Context and Resources  **BCTs:** ['7.1 Prompts/cues', '5.1 Information about health consequences', '5.3 Information about social and environmental consequences'] **TDFs**: Memory, Attention and Decision Processes; Environmental Context and Resources  **MoA:** Memory, Attention and Decision Processes; Environmental Context and Resources  **BCTs:** ['12.1 Restructuring the physical environment', '3.1 Social support (unspecified)'; Behavioural Regulation ((delayed Rx) **TDFs:** Environmental Context and Resources  **MoA:** Environmental Context and Resources  **BCTs:** ['7.1 Prompts/cues', '12.1 Restructuring the physical environment'] **TDFs:** Memory, Attention and Decision Processes; Environmental Context and Resources  **MoA:** Memory, Attention and Decision Processes; Environmental Context and Resources |
| MOTIVATION - Brain processes that energise and direct behaviour, including related to habit, emotions, and analytical/cognitive decision-making | | | |
| Reflective motivation | Conscious, deliberate thought; **reasoned decision-making,** weighing up **pros and cons**.  Sense of **reward/satisfaction in reducing AB use** - more concrete evidence of a positive outcome needed e.g. less AMR or conversely – the **trauma of AMR if behaviour does not change.**  Is **AMR a real – is it ‘on my radar’** of **real-life risk?** Here and now threat to people or is it **psychologically distant (cognitively)?**  Is it possible to have realistic intentions (conscious planning, evaluation, and decision-making) around changing AB use – especially if **long lag time between receiving comms/engagement around ABX and seeing AB from a prescriber?** Is AMR/ AB use prioritised in any way?  **Reflecting on how own beliefs, values, and intentions mirror/relate to story**  **Persuasive power** sits within both reflective and automatic motivation & is a product of many MoAs, BCTs/TDFs  **Influenced by:** school &public health education, adverts, general media e.g .films, documentaries, news, storytelling | **Modify risk perceptions and perceived susceptibility to AMR**  **Understanding and reflecting on consequences of antibiotic misuse inc. simultaneously impart knowledge** e.g. AMR can affect healthy people too, e.g bacterial resistance vs. body tolerance. Moulds beliefs about consequences, social and moral norms and beliefs  **Reinforcing personal identity (aligning behaviour with a person’s self identity & values)** as a responsible antibiotic user inc. consumer choices. **Transactional relationship between self and story (drawing on own frame/s of reference)**  **Shaping positive beliefs and intentions using human impact stories inc.**  informed by human impact stories & consequences  **Encouraging reflection through relatable narratives, metaphors, real-life scenarios inc. settings, language, fears, imagery, music.. inc.** in-depth engagement e.g. human impact stories . These DST devices anchor abstract ideas, feelings to understandable concepts.  **Promoting altruistic values – preserving antibiotics for vulnerable populations e.g. cancer or CF patients, inc.** Reflect **individual’s priorities e.g. with a sick toddler**  **Reflecting on the ‘quick fix’ norm and shifting beliefs toward non-antibiotic recovery**  **Addressing sense of futility about individual action on AMR** | **BCTs:** 5.1 Information about health consequences, '5.2 Salience of consequences, 5.5 Anticipated regret **TDFs:** Beliefs about Consequences; Perceived Susceptibility  **MoA:** Beliefs about Consequences; Perceived Susceptibility  **BCTs:** 5.1 Information about health consequences, 5.3 Information about social and environmental consequences, 13.2 Framing/reframing **TDFs:** Beliefs about Consequences  **MoA:** Beliefs about Consequences  **BCTs:** 13.1 Identification of self as role model, '15.3 Focus on past success, 13.2 Framing/reframing **TDFs:** Social/Professional Role and Identity  **MoA:** Social/Professional Role and Identity  **BCTs:** 5.1 Information about health consequences, 5.6 Information about emotional consequences, 13.2 Framing/reframing'] **TDFs:** Beliefs about Consequences; Emotion  **MoA:** Beliefs about Consequences; Emotion  **BCTs:** 6.1 Demonstration of the behaviour, '13.2 Framing/reframing', 9.1 Credible source, 5.6 Information about emotional consequences, 13.3 Incompatible beliefs**, TDFs:** Beliefs about Consequences; Social Influences  **MoA:** Beliefs about Consequences; Social Learning/Imitation  **BCTs:** '5**.**3 Information about social and environmental consequences', '13.2 Framing/reframing' **TDFs:** Values; Beliefs about Consequences  **MoA:** Values; Beliefs about Consequences  **BCTs:** '5.1 Information about health consequences', '13.2 Framing/reframing', '6.2 Social comparison'] **TDFs:** Beliefs about Consequences; Social Influences  **MoA:** Beliefs about Consequences; Social Norms  **BCTs:** '15.1 Verbal persuasion about capability', '5.3 Information about social and environmental consequences', '1.2 Problem solving' **TDFs:** Beliefs about Consequences; Beliefs about Capabilities  **MoA:** Beliefs about Consequences; Self-Efficacy |
| Automatic motivation | **Emotions, habits, and impulses, directly drive behaviours** (animal brain – without conscious thought) e.g. decisions around AB need/want/AMR consequences (via story)  Perceived similarity generates **affective responses inc.** empathy, fear, inspiration  Concepts of how **reducing AB use fits with one’s self-identity** (self-considered high or low AB user, and high/low risk of AMR personally) Can an **individual viewer identify with a story** – character, setting, scenario and thus empathise, emotively engage? Long ingrained habits of AB use.  **Influenced by:** emotive, relatable stories, imagery, messages that connect on a level without conscious thought | **'Habitual’ or routine ‘ consulting an HCP for of advice or antibiotics** when unnecessary  **Fear of worsening infection** prompts antibiotic use  **Social norm: 'everyone else takes them so will I'.**  **Emotional appeal aligned with core values (e.g. empathy, concern, altruism).** Identifying with self-concepts, e.g. responsible AB user. Awareness future regret of a behaviour eg. overuse AB. Also, DST devices **eg imagery, script devices, music, transitions**… **can trigger emotional responses**  **Use of emotional states (fear/empathy & story immersion) to reduce psychological distance** inc. antibiotics are kept working for people in real need (altruism motivated by the emotional state of empathy).  **Feeling personal behaviour has no impact on global AMR**  **‘Habitual’ or routine antibiotic use for minor illness despite cognitive understanding** | **BCTs:** 8.3 Habit formation, '8.1 Behavioural practice/rehearsal', '10.4 Social reward' **TDFs:** Emotion  **MoA:** Reinforcement; Behavioural Regulation; Emotion  **BCTs:** 5.1 Information about health consequences, '5.2 Salience of consequences', '5.5 Anticipated regret' **TDFs:** Emotion; Beliefs about Consequences  **MoA:** Emotion; Beliefs about Consequences  **BCTs:** 6.2 Social comparison**,** 6.3 Information about others’ approval', 13.2 Framing/reframing **TDFs:** Social Influences; Social/Professional Role and Identity; Emotion  **MoA:** Social Influences; Norms; Emotion  **BCTs:** 5.6 Information about emotional consequences, '5.3 Information about social and environmental consequences', 13.2 Framing/reframing, 13.1 Valued self-identity, 5.5 Anticipated regret, 7.1 Prompts/cues  **TDFS:** Emotion; Goals; Values  **MoA:** Emotion; Values  **BCTs:** 5.2 Salience of consequences, 5.6 Information about emotional consequences, '13.2 Framing/reframing **TDF:** Emotion.  **MoA**: Emotion  **BCTs:** 15.1 Verbal persuasion about capability, '5.3 Information about social and environmental consequences, 1.2 Problem solving **TDFs:** Emotion; Beliefs about Capabilities  **MoA:** Emotion; Beliefs about Capabilities  **BCTs:** 8.3 Habit formation, 10.4 Social reward, 2.3 Self-monitoring of behaviour **TDFs:** Reinforcement; Behavioural Regulation; Emotion  **MoA:** Reinforcement; Behavioural Regulation; Emotion |
